# Supplementary material for: The impact of exchanging the light and heavy chains on the structures of bovine ultralong antibodies
Source: PubMed Central journal article supplement (PMC11229553; doi:10.1107/s2053230x2400606x), 2024-07-01
Supplement: f-80-00154-sup1.pdf [file f-80-00154-sup1.pdf]

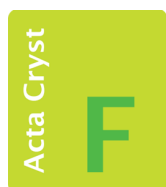

STRUCTURAL BIOLOGY  
COMMUNICATIONS

**Volume 80 (2024)**

**Supporting information for article:**

**The impact of exchanging the light and heavy chains on the structures of bovine ultralong antibodies**

**John D. Clarke, Alice Douangamath, Halina Mikolajek, Marie Bonnet-Di Placido, Jingshan Ren, Elizabeth E. Fry, Dave I. Stuart, John A. Hammond and Raymond J. Owens**

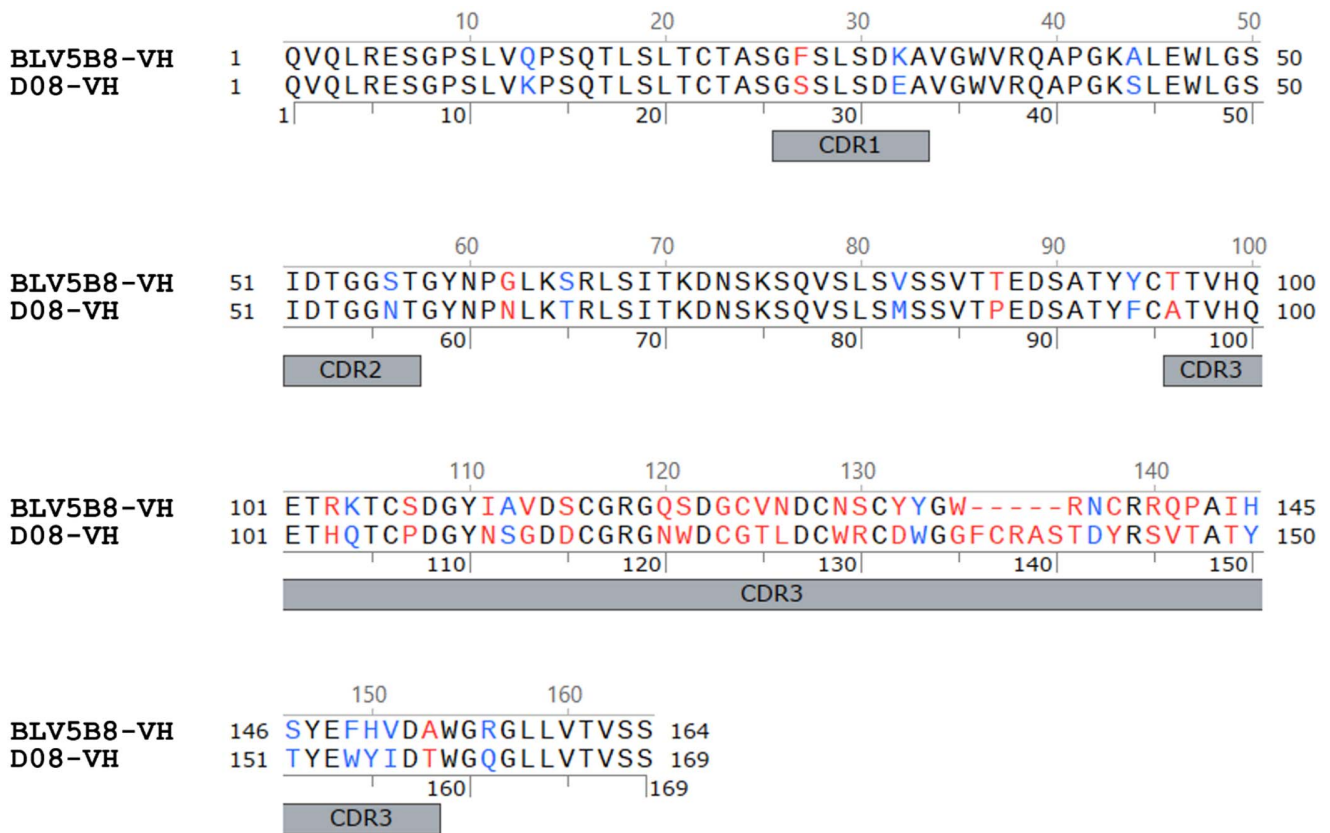

**Figure S1** Multiple Sequence Alignment of the BLV5B8 and D08 heavy chain variable domains. Black indicates residue identity, blue indicates similarity, and red indicates differences. Positions of CDRs are marked.

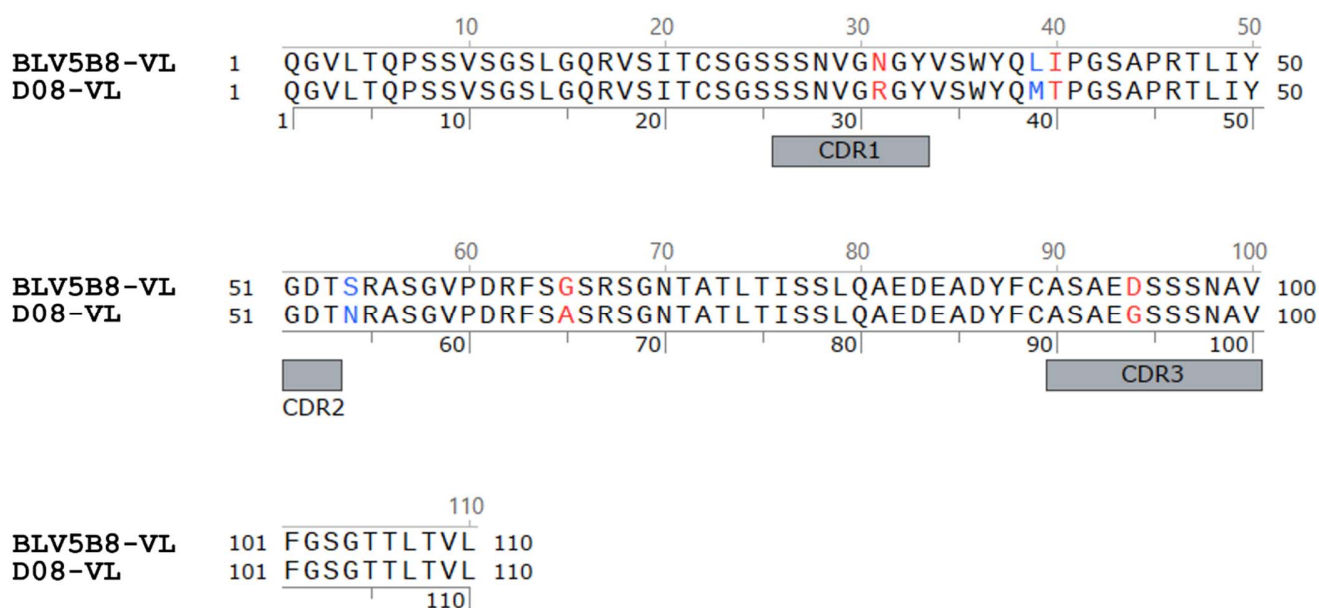

**Figure S2** Multiple Sequence Alignment of the BLV5B8 and D08 light chain variable domains. Black indicates residue identity, blue indicates similarity, and red indicates differences. Positions of CDR's are marked.

### S1. Description of gene segment recombinations, and shared identity between each heavy chain and light chain

The light chain of both antibodies D08, and BLV5B8 were produced by a V-J recombination involving gene segments IgLV1-47\*01 and IgLJ4\*01, and harbour a CDR3L of 11 residues. The D08 and BLV5B8 light chains share 94.29 % and 90.91 % identity over the variable domain, and CDR3L respectively.

The heavy chain of both antibodies D08, and BLV5B8 were produced by a V-D-J recombination involving gene segments IgHV1-7\*02, IgHD8-2\*01, and IgHJ2-4\*01, and harbour a CDR3H of 65 and 54 residues respectively. The D08 and BLV5B8 heavy chains share 71.60 % and 42.62 % identity over the variable domain, and CDR3H respectively.

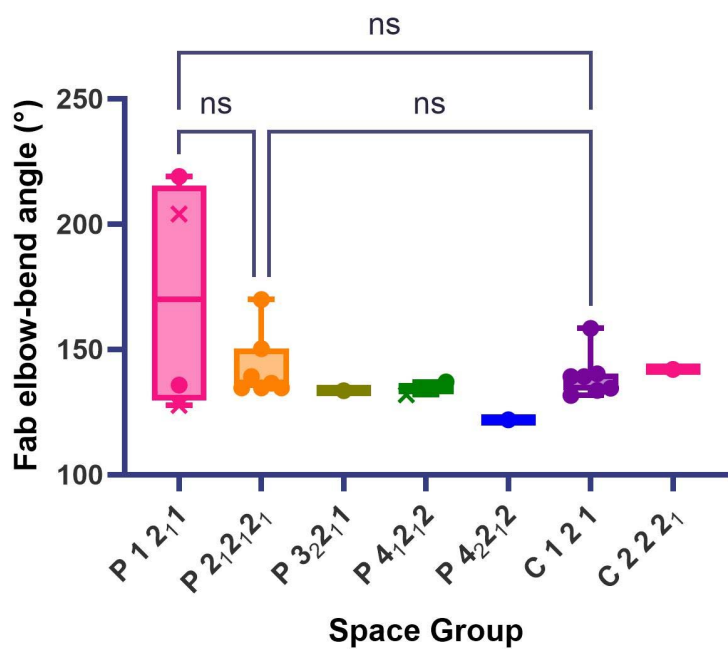

**Figure S3** Comparison of elbow-bend angles (Stanfield *et al.*, 2006) and space groups for deposited ultralong Fab structures. Where significant additional contributions to the pseudo-twofold axes were identified, these points are plotted as a cross. Kruskal-Wallis test was performed (due to small sample sizes and non-gaussian distribution of elbow angles) with multiple comparisons between space groups comprising 4 or greater structures. P value for all comparisons was  $>0.9999$ .

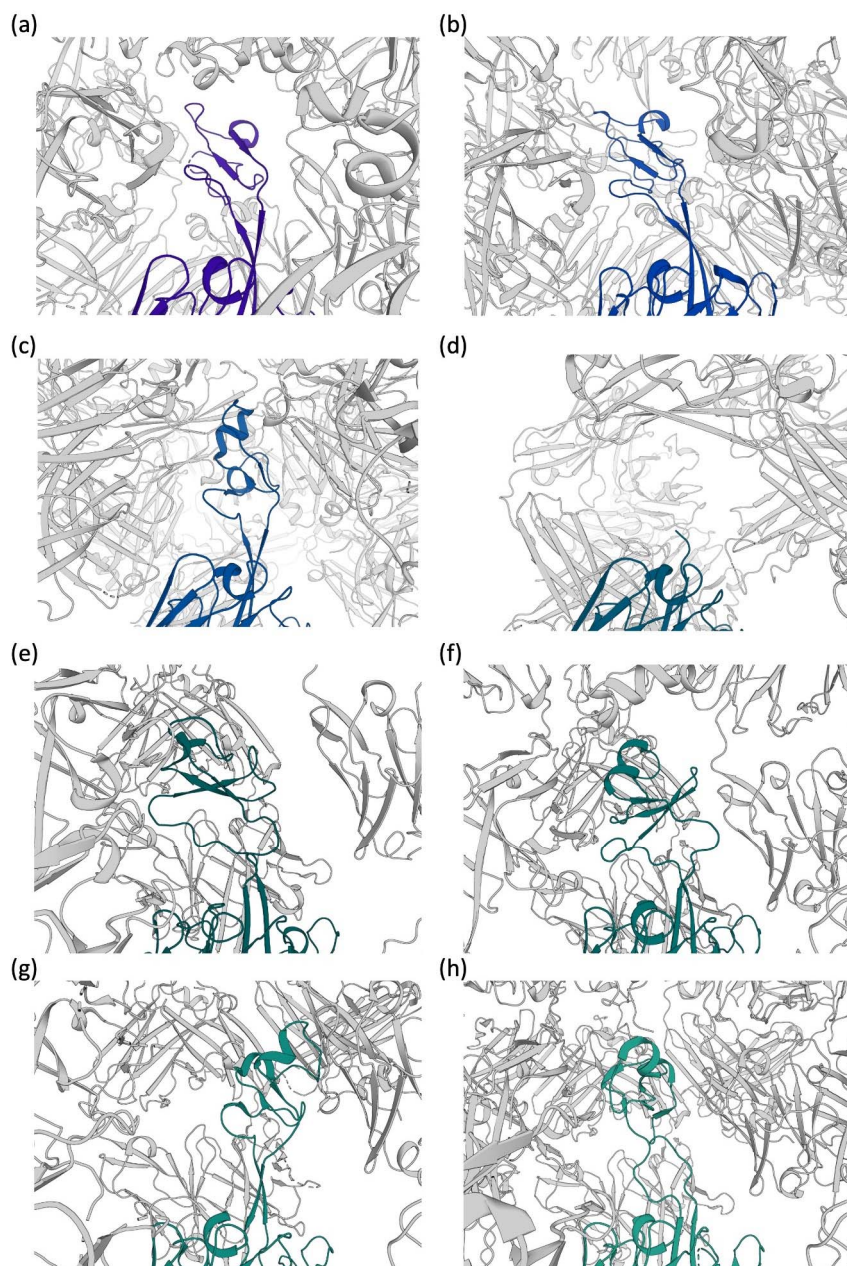

**Figure S4** Crystalline packing of ultralong loops of antibodies (a) D08, (b) D08\*, (c) BLV5B8 (PDB ID: 4K3E; Wang *et al.*, 2013), (d) BLV5B8\*, (e) B11 (PDB ID: 5IHU; Stanfield *et al.*, 2016), (f) A01 (PDB ID: 5ILT; Stanfield *et al.*, 2016), (g) BOV-2 (PDB ID: 6E9G; Dong *et al.*, 2019), and (h) NC-Cow1 (PDB ID: 6OO0; Stanfield *et al.*, 2020). Crystals presented space groups  $P 2_1 2_1 2_1$  (a-c) or  $C 1 2 1$  (d-h).

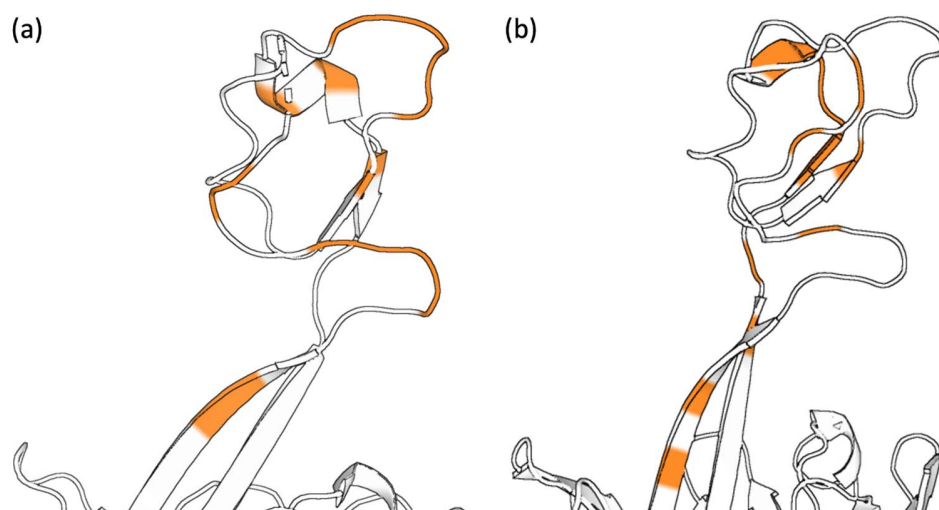

**Figure S5** The ultralong knob mini-domain makes extensive crystalline contacts with symmetry mates. The knob mini-domains of (a) Fab D08, and (b) Fab D08\*, with crystallographic interfacing residues coloured orange, as identified by PISA analysis (Krissinel & Henrick, 2007).
